# Supplementary material for: Zika Virus IgG in Infants with Microcephaly, Guinea-Bissau, 2016
Source: PubMed Central journal article supplement (PMC5938792; doi:10.3201/eid2405.180153), 2018-05
Supplement: 18-0153-Techapp-s1.pdf [file 18-0153-Techapp-s1.pdf]

# Zika Virus IgG in Infants with Microcephaly, Guinea-Bissau, 2016

## Technical Appendix

**Technical Appendix Table 1.** Epidemiologic characteristics and diagnostics test results of infants with microcephaly and their mothers, cases A-G, Guinea-Bissau, 2016\*

| Category                               | Case                                                                              |        |                                                                                   |        |                                                                                    |        |                                                                                     |        |                                                                                     |        |                                                                                     |        |                                                                                     |        |
|----------------------------------------|-----------------------------------------------------------------------------------|--------|-----------------------------------------------------------------------------------|--------|------------------------------------------------------------------------------------|--------|-------------------------------------------------------------------------------------|--------|-------------------------------------------------------------------------------------|--------|-------------------------------------------------------------------------------------|--------|-------------------------------------------------------------------------------------|--------|
|                                        | A                                                                                 |        | B                                                                                 |        | C                                                                                  |        | D                                                                                   |        | E                                                                                   |        | F                                                                                   |        | G                                                                                   |        |
| Patient                                | Infant†                                                                           | Mother | Infant                                                                            | Mother | Infant†                                                                            | Mother | Infant†                                                                             | Mother | Infant                                                                              | Mother | Infant                                                                              | Mother | Infant                                                                              | Mother |
| Age                                    | 1 m†                                                                              | 18 y   | 4 m                                                                               | 24 y   | 5 d†                                                                               | 18 y   | 9 m                                                                                 | 30 y   | 3 m                                                                                 | 20 y   | 5 m                                                                                 | 30 y   | 5 m                                                                                 | 22 y   |
| Image of infant                        |  |        |  |        |  |        |  |        |  |        |  |        |  |        |
| Region                                 | Bafatá                                                                            |        | Bafatá                                                                            |        | Bafatá                                                                             |        | Oio                                                                                 |        | Gabú                                                                                |        | Gabú                                                                                |        | Bafatá                                                                              |        |
| Village                                | Sta Gaulo                                                                         |        | Tantam Cossé                                                                      |        | Contubel                                                                           |        | Nhacra                                                                              |        | Buruntuma                                                                           |        | Duma                                                                                |        | Tantam Cossé                                                                        |        |
| Symptoms of mother during pregnancy    | Periodic headache                                                                 |        | Weakness                                                                          |        | None                                                                               |        | None                                                                                |        | Periodic headache                                                                   |        | Fever                                                                               |        | Fever, headache, weakness, stomach pain                                             |        |
| Month of birth                         | August                                                                            |        | September                                                                         |        | August                                                                             |        | June                                                                                |        | May                                                                                 |        | June                                                                                |        | May                                                                                 |        |
| Birthweight                            | Not reported                                                                      |        | Not reported                                                                      |        | Not reported                                                                       |        | 2,900 g                                                                             |        | 2,800 g                                                                             |        | Not reported                                                                        |        | Not reported                                                                        |        |
| Weight at sampling                     | 2,200 g                                                                           |        | 3,550 g                                                                           |        | Not reported                                                                       |        | Not reported                                                                        |        | Not reported                                                                        |        | Not reported                                                                        |        | 6,200 g                                                                             |        |
| Infant sex                             | M                                                                                 |        | F                                                                                 |        | F                                                                                  |        | F                                                                                   |        | F                                                                                   |        | M                                                                                   |        | M                                                                                   |        |
| Infant head circumference (1) at birth | 25 cm                                                                             |        | 26 cm                                                                             |        | 25 cm                                                                              |        | Not reported                                                                        |        | Not reported                                                                        |        | Not reported                                                                        |        | Not reported                                                                        |        |
| Girls: reference range (31.7–36.1 cm)  |                                                                                   |        |                                                                                   |        |                                                                                    |        |                                                                                     |        |                                                                                     |        |                                                                                     |        |                                                                                     |        |
| Boys: reference range (32.1–36.9 cm)   |                                                                                   |        |                                                                                   |        |                                                                                    |        |                                                                                     |        |                                                                                     |        |                                                                                     |        |                                                                                     |        |
| Infant head circumference at sampling  | Not reported                                                                      |        | Not reported                                                                      |        | Not reported                                                                       |        | 31.5 cm                                                                             |        | Not reported                                                                        |        | Not reported                                                                        |        | 35 cm                                                                               |        |
| Girls: reference range (39.0–43.9 cm)  |                                                                                   |        |                                                                                   |        |                                                                                    |        |                                                                                     |        |                                                                                     |        |                                                                                     |        |                                                                                     |        |
| Boys: reference range (40.3–44.8 cm)   |                                                                                   |        |                                                                                   |        |                                                                                    |        |                                                                                     |        |                                                                                     |        |                                                                                     |        |                                                                                     |        |
| Clinical symptoms                      | Microcephaly                                                                      |        | Microcephaly                                                                      |        | Microcephaly                                                                       |        | Microcephaly                                                                        |        | Microcephaly                                                                        |        | Microcephaly                                                                        |        | Microcephaly                                                                        |        |
| Pathogen, diagnostic test              |                                                                                   |        |                                                                                   |        |                                                                                    |        |                                                                                     |        |                                                                                     |        |                                                                                     |        |                                                                                     |        |
| Zika virus                             |                                                                                   |        |                                                                                   |        |                                                                                    |        |                                                                                     |        |                                                                                     |        |                                                                                     |        |                                                                                     |        |
| RT-qPCR§                               | NA                                                                                | –      | –                                                                                 | –      | NA                                                                                 | –      | NA                                                                                  | –      | –                                                                                   | –      | –                                                                                   | –      | –                                                                                   | –      |
| IgM¶                                   | NA                                                                                | –      | –                                                                                 | –      | NA                                                                                 | –      | NA                                                                                  | –      | –                                                                                   | –      | –                                                                                   | –      | –                                                                                   | –      |
| IgG¶                                   | NA                                                                                | +      | +                                                                                 | +      | NA                                                                                 | –      | NA                                                                                  | +      | +                                                                                   | +      | +                                                                                   | +      | +                                                                                   | –      |
| Nab#                                   | NA                                                                                | >640   | 200                                                                               | >640   | NA                                                                                 | >640   | NA                                                                                  | 480    | 240                                                                                 | 400    | >640                                                                                | 538    | 80                                                                                  | >640   |
| Dengue virus                           |                                                                                   |        |                                                                                   |        |                                                                                    |        |                                                                                     |        |                                                                                     |        |                                                                                     |        |                                                                                     |        |
| IgM¶                                   | NA                                                                                | –      | –                                                                                 | –      | NA                                                                                 | –      | NA                                                                                  | –      | –                                                                                   | –      | –                                                                                   | –      | –                                                                                   | –      |
| IgG¶                                   | NA                                                                                | +      | –                                                                                 | +      | NA                                                                                 | +      | NA                                                                                  | –      | +                                                                                   | +      | –                                                                                   | –      | –                                                                                   | –      |
| Nab#                                   | NA                                                                                | NA     | –                                                                                 | NA     | NA                                                                                 | NA     | NA                                                                                  | NA     | 53                                                                                  | NA     | NA                                                                                  | NA     | –                                                                                   | NA     |
| Chikungunya virus                      |                                                                                   |        |                                                                                   |        |                                                                                    |        |                                                                                     |        |                                                                                     |        |                                                                                     |        |                                                                                     |        |

| Category<br>Patient           | Case    |        |        |        |         |        |         |        |        |        |        |        |        |        |
|-------------------------------|---------|--------|--------|--------|---------|--------|---------|--------|--------|--------|--------|--------|--------|--------|
|                               | A       |        | B      |        | C       |        | D       |        | E      |        | F      |        | G      |        |
|                               | Infant† | Mother | Infant | Mother | Infant† | Mother | Infant† | Mother | Infant | Mother | Infant | Mother | Infant | Mother |
| IgM¶                          | NA      | -      | -      | -      | NA      | -      | NA      | -      | -      | -      | -      | -      | -      | -      |
| IgG¶                          | NA      | +      | +      | +      | NA      | +      | NA      | -      | +      | +      | -      | -      | -      | -      |
| <i>Toxoplasma gondii</i>      |         |        |        |        |         |        |         |        |        |        |        |        |        |        |
| IgM**                         |         | NA     |        | -      |         | -      |         | -      |        | -      |        | NA     |        | -      |
| IgG**                         |         |        |        | -      |         | 230    |         | -      |        | -      |        |        |        | -      |
| <i>Treponema pallidum</i>     |         |        |        |        |         |        |         |        |        |        |        |        |        |        |
| IgG††                         |         | NA     |        | -      |         | -      |         | -      |        | -      |        | NA     |        | -      |
| Parvovirus                    |         |        |        |        |         |        |         |        |        |        |        |        |        |        |
| qPCR‡‡                        | NA      |        | -      |        | NA      |        | NA      |        | -      |        | -      |        | -      |        |
| IgG¶¶                         |         | NA     |        | 0.74   |         | 0.90   |         | 0.64   |        | 0.90   |        | NA     |        | 0.89   |
| <i>Varicella-zoster virus</i> |         |        |        |        |         |        |         |        |        |        |        |        |        |        |
| qPCR‡‡                        | NA      |        | -      |        | NA      |        | NA      |        | -      |        | -      |        | -      |        |
| IgG††                         |         | NA     |        | INC    |         | 800    |         | 800    |        | 800    |        | NA     |        | 200    |
| <i>Rubella virus</i>          |         |        |        |        |         |        |         |        |        |        |        |        |        |        |
| qPCR‡‡                        | NA      |        | -      |        | NA      |        | NA      |        | -      |        | -      |        | -      |        |
| IgG§§                         |         | NA     |        | 80     |         | 102    |         | 87     |        | 160    |        | NA     |        | INC    |
| <i>Cytomegalovirus</i>        |         |        |        |        |         |        |         |        |        |        |        |        |        |        |
| qPCR‡‡                        | NA      |        | -      |        | NA      |        | NA      |        | -      |        | -      |        | -      |        |
| IgM††                         |         | NA     |        | NA     |         | NA     |         | NA     |        | NA     |        | NA     |        | NA     |
| IgG††                         |         | NA     |        | >640   |         | 40     |         | -      |        | 80     |        | NA     |        | 5      |
| <i>Herpes simplex virus</i>   |         |        |        |        |         |        |         |        |        |        |        |        |        |        |
| qPCR‡‡                        | NA      |        | -      |        | NA      |        | NA      |        | -      |        | -      |        | -      |        |
| IgG††                         |         | NA     |        | 1.98   |         | 1.85   |         | 2.23   |        | 1.82   |        | NA     |        | 1.65   |

\*INC, inconclusive; NA, not analyzed; Nab, neutralizing antibody; RT-qPCR, reverse transcription quantitative PCR; qPCR, quantitative PCR.

†Samples not sent to Statens Serum Institut (Copenhagen, Denmark) for analysis.

‡Deceased.

§In-house PCR modified from Faye et al (2).

¶Arbovirus Fever Mosaic 2 (Zika virus, chikungunya virus, dengue virus) (IgG/IgM) (Euroimmun AG, Luebeck, Germany).

#Neutralization assay with African strain MR766. Positive antibody titers are shown.

\*\*VIDAS TOXO IgG II (bioMérieux, Marcy l'Etoile, France). Positive antibody titers are shown.

††In-house ELISA. Positive antibody titers are shown.

‡‡In-house qPCR. Positive Cq values are shown.

§§ Enzygnost anti-Rubella-Virus IgG (Siemens Healthineers, Erlangen, Germany). Positive antibody titers are shown.

¶¶LIAISON Biotrin Parvovirus B19 IgG (DiaSorin, Saluggia, Italy). Positive antibody titers are shown.

**Technical Appendix Table 2.** Epidemiologic characteristics and diagnostics test results of infants with microcephaly and their mothers, cases H-O, Guinea-Bissau, 2016\*

| Category                               | Case                                                                              |        |                                                                                   |        |                                                                                   |        |                                                                                     |        |                                                                                     |        |                                                                                     |        |                                                                                     |        |                                                                                     |        |
|----------------------------------------|-----------------------------------------------------------------------------------|--------|-----------------------------------------------------------------------------------|--------|-----------------------------------------------------------------------------------|--------|-------------------------------------------------------------------------------------|--------|-------------------------------------------------------------------------------------|--------|-------------------------------------------------------------------------------------|--------|-------------------------------------------------------------------------------------|--------|-------------------------------------------------------------------------------------|--------|
|                                        | H                                                                                 |        | I                                                                                 |        | J                                                                                 |        | K                                                                                   |        | L                                                                                   |        | M                                                                                   |        | N                                                                                   |        | O                                                                                   |        |
| Patient                                | Infant                                                                            | Mother | Infant                                                                            | Mother | Infant                                                                            | Mother | Infant                                                                              | Mother | Infant                                                                              | Mother | Infant                                                                              | Mother | Infant                                                                              | Mother | Infant                                                                              | Mother |
| Age                                    | 5 m                                                                               | 18 y   | 7 m                                                                               | 30 y   | 4 m                                                                               | 22 y   | 8 m                                                                                 | 25 y   | 4 m                                                                                 | 15 y   | 5 m                                                                                 | 31 y   | 5 m                                                                                 | 18 y   | 1 †                                                                                 | 22 y   |
| Image of infant                        |  |        |  |        |  |        |  |        |  |        |  |        |  |        |  |        |
| Region                                 | Bafatá                                                                            |        | Bolama                                                                            |        | Bafatá                                                                            |        | Gabú                                                                                |        | Farim                                                                               |        | Bafatá                                                                              |        | Bafatá                                                                              |        | Gabú                                                                                |        |
| Village                                | Tendito                                                                           |        | Bolama                                                                            |        | Cambadju                                                                          |        | Dara                                                                                |        | Farim                                                                               |        | Xitole                                                                              |        | Xitole                                                                              |        | Gabú                                                                                |        |
| Symptoms of mother during pregnancy    | Fever, myalgia, headache, weakness, stomach pain                                  |        | Headache, vaginal discharge                                                       |        | Fever, headache, weakness                                                         |        | Fever, arthralgia, myalgia, headache, weakness, anemia (received blood transfusion) |        | Headache                                                                            |        | Weakness, stomach pain                                                              |        | Fever, headache, weakness, stomach pain                                             |        | None                                                                                |        |
| Month of birth                         | May                                                                               |        | March                                                                             |        | June                                                                              |        | February                                                                            |        | June                                                                                |        | May                                                                                 |        | May                                                                                 |        | August                                                                              |        |
| Birthweight                            | Not reported                                                                      |        | 2,600 g                                                                           |        | Not reported                                                                      |        | Not reported                                                                        |        | 2,300 g                                                                             |        | Not reported                                                                        |        | 3,200 g                                                                             |        | Not reported                                                                        |        |
| Weight at sampling                     | Not reported                                                                      |        | Not reported                                                                      |        | 5,800 g                                                                           |        | Not reported                                                                        |        | Not reported                                                                        |        | 6,100 g                                                                             |        | No info                                                                             |        | Not reported                                                                        |        |
| Infant sex                             | F                                                                                 |        | F                                                                                 |        | F                                                                                 |        | M                                                                                   |        | M                                                                                   |        | F                                                                                   |        | F                                                                                   |        | M                                                                                   |        |
| Infant head circumference (1) at birth | Not reported                                                                      |        | Not reported                                                                      |        | Not reported                                                                      |        | Not reported                                                                        |        | Not reported                                                                        |        | Not reported                                                                        |        | Not reported                                                                        |        | Not reported                                                                        |        |
| Girls: reference range (31.7–36.1 cm)  |                                                                                   |        |                                                                                   |        |                                                                                   |        |                                                                                     |        |                                                                                     |        |                                                                                     |        |                                                                                     |        |                                                                                     |        |
| Boys: reference range (32.1–36.9 cm)   |                                                                                   |        |                                                                                   |        |                                                                                   |        |                                                                                     |        |                                                                                     |        |                                                                                     |        |                                                                                     |        |                                                                                     |        |
| Infant head circumference at sampling  | 34 cm                                                                             |        | 35 cm                                                                             |        | 33 cm                                                                             |        | 36.5 cm                                                                             |        | 34 cm                                                                               |        | 34 cm                                                                               |        | 33 cm                                                                               |        | Not reported                                                                        |        |
| Girls: reference range (39.0–43.9 cm)  |                                                                                   |        |                                                                                   |        |                                                                                   |        |                                                                                     |        |                                                                                     |        |                                                                                     |        |                                                                                     |        |                                                                                     |        |
| Boys: reference range (40.3–44.8 cm)   |                                                                                   |        |                                                                                   |        |                                                                                   |        |                                                                                     |        |                                                                                     |        |                                                                                     |        |                                                                                     |        |                                                                                     |        |
| Clinical symptoms                      | Microcephaly, malformed umbilicus                                                 |        | Microcephaly, abnormal psychomotor development                                    |        | Microcephaly                                                                      |        | Microcephaly, conjunctivitis, abnormal psychomotor development                      |        | Microcephaly                                                                        |        | Microcephaly, visual problems                                                       |        | Microcephaly                                                                        |        | Microcephaly                                                                        |        |
| Pathogen, diagnostic test              |                                                                                   |        |                                                                                   |        |                                                                                   |        |                                                                                     |        |                                                                                     |        |                                                                                     |        |                                                                                     |        |                                                                                     |        |
| Zika virus                             |                                                                                   |        |                                                                                   |        |                                                                                   |        |                                                                                     |        |                                                                                     |        |                                                                                     |        |                                                                                     |        |                                                                                     |        |
| PCR§                                   | –                                                                                 | –      | –                                                                                 | –      | –                                                                                 | –      | –                                                                                   | –      | –                                                                                   | –      | –                                                                                   | –      | –                                                                                   | –      | –                                                                                   | –      |
| IgM¶                                   | –                                                                                 | –      | –                                                                                 | –      | –                                                                                 | –      | –                                                                                   | –      | –                                                                                   | –      | –                                                                                   | –      | –                                                                                   | –      | –                                                                                   | –      |
| IgG¶                                   | +                                                                                 | +      | +                                                                                 | +      | +                                                                                 | –      | –                                                                                   | +      | +                                                                                   | +      | +                                                                                   | +      | +                                                                                   | +      | +                                                                                   | –      |
| Nab#                                   | >640                                                                              | 640    | >640                                                                              | 120    | 140                                                                               | 560    | 18                                                                                  | >640   | >640                                                                                | >640   | 240                                                                                 | >640   | 50                                                                                  | 480    | NA                                                                                  | –      |
| Dengue virus                           |                                                                                   |        |                                                                                   |        |                                                                                   |        |                                                                                     |        |                                                                                     |        |                                                                                     |        |                                                                                     |        |                                                                                     |        |
| IgM¶                                   | –                                                                                 | –      | –                                                                                 | –      | –                                                                                 | –      | –                                                                                   | –      | –                                                                                   | –      | –                                                                                   | –      | –                                                                                   | –      | –                                                                                   | –      |
| IgG¶                                   | +                                                                                 | –      | –                                                                                 | –      | –                                                                                 | –      | –                                                                                   | +      | +                                                                                   | +      | +                                                                                   | –      | –                                                                                   | +      | –                                                                                   | –      |
| Nab#                                   | –                                                                                 | NA     | NA                                                                                | –      | –                                                                                 | NA     | –                                                                                   | NA     | –                                                                                   | NA     | –                                                                                   | NA     | –                                                                                   | NA     | NA                                                                                  | NA     |
| Chikungunya virus                      |                                                                                   |        |                                                                                   |        |                                                                                   |        |                                                                                     |        |                                                                                     |        |                                                                                     |        |                                                                                     |        |                                                                                     |        |
| IgM¶                                   | –                                                                                 | –      | –                                                                                 | –      | –                                                                                 | –      | –                                                                                   | –      | –                                                                                   | –      | –                                                                                   | –      | –                                                                                   | –      | –                                                                                   | –      |
| IgG¶                                   | –                                                                                 | +      | –                                                                                 | –      | –                                                                                 | –      | –                                                                                   | +      | –                                                                                   | –      | –                                                                                   | +      | –                                                                                   | –      | –                                                                                   | –      |

| Category                  | Case   |        |        |        |        |        |        |        |        |        |        |        |        |        |        |        |      |
|---------------------------|--------|--------|--------|--------|--------|--------|--------|--------|--------|--------|--------|--------|--------|--------|--------|--------|------|
|                           | H      |        | I      |        | J      |        | K      |        | L      |        | M      |        | N      |        | O      |        |      |
| Patient                   | Infant | Mother | Infant | Mother | Infant | Mother | Infant | Mother | Infant | Mother | Infant | Mother | Infant | Mother | Infant | Mother |      |
| <i>Toxoplasma gondii</i>  |        |        |        |        |        |        |        |        |        |        |        |        |        |        |        |        | †    |
| IgM**                     |        | NA     |        | –      |        | –      |        | NA     |        | –      |        | NA     |        | –      |        |        | –    |
| IgG**                     |        | NA     |        | –      |        | –      |        |        |        | –      |        | NA     |        | –      |        |        | –    |
| <i>Treponema pallidum</i> |        |        |        |        |        |        |        |        |        |        |        |        |        |        |        |        |      |
| IgG††                     |        | NA     |        | –      |        | –      |        | NA     |        | –      |        | NA     |        | –      |        |        | –    |
| Parvovirus                |        |        |        |        |        |        |        |        |        |        |        |        |        |        |        |        |      |
| qPCR‡‡                    | –      |        | –      |        | –      |        | –      |        | –      |        | –      |        | –      |        |        |        | NA   |
| IgG¶¶                     |        | NA     |        | –      |        | 0.41   |        | NA     |        | 1.76   |        | NA     |        | –      |        |        | INC  |
| Varicella-zoster virus    |        |        |        |        |        |        |        |        |        |        |        |        |        |        |        |        |      |
| qPCR‡‡                    | –      |        | –      |        | –      |        | –      |        | –      |        | –      |        | –      |        |        |        | NA   |
| IgG††                     |        | NA     |        | 200    |        | 200    |        | NA     |        | 400    |        | NA     |        | 400    |        |        | 800  |
| Rubella virus             |        |        |        |        |        |        |        |        |        |        |        |        |        |        |        |        |      |
| qPCR‡‡                    | –      |        | –      |        | –      |        | –      |        | –      |        | –      |        | –      |        |        |        | NA   |
| IgG§§                     |        | NA     |        | 131    |        | 120    |        | NA     |        | 101    |        | NA     |        | >200   |        |        | 178  |
| Cytomegalovirus           |        |        |        |        |        |        |        |        |        |        |        |        |        |        |        |        |      |
| qPCR‡‡                    | 36     | –      | –      |        | 31     | –      | –      |        | –      |        | 36     | –      | 34     | –      |        |        | NA   |
| IgM††                     | 200    | –      |        | NA     | –      | –      |        | NA     |        | NA     | –      | –      | 400    | 200    |        |        | NA   |
| IgG††                     | 160    | NA     |        | 160    | 80     | 40     |        | NA     |        | 320    | 80     | NA     | 80     | 40     |        |        | 320  |
| Herpes simplex virus      |        |        |        |        |        |        |        |        |        |        |        |        |        |        |        |        |      |
| qPCR‡‡                    | –      | –      | –      |        | –      |        | –      |        | –      |        | –      |        | –      |        |        |        | NA   |
| IgG††                     |        | NA     |        | 2.01   |        | 2.03   |        | NA     |        | 1.94   |        | NA     |        | 2.00   |        |        | 2.24 |

\*INC, inconclusive; NA, not analyzed; Nab, neutralizing antibody; RT-qPCR, reverse transcription quantitative PCR; qPCR, quantitative PCR.

†Samples not sent to Statens Serum Institut (Copenhagen, Denmark) for analysis.

‡Deceased.

§In-house PCR modified from Faye et al (2).

¶ Arbovirus Fever Mosaic 2 (Zika virus, chikungunya virus, dengue virus) (IgG/IgM) (Euroimmun AG, Luebeck, Germany).

#Neutralization assay with African strain MR766. Positive antibody titers are shown.

\*\*VIDAS TOXO IgG II (BioMerieux, Marcy l'Etoile, France). Positive antibody titers are shown.

††In-house ELISA. Positive antibody titers are shown.

‡‡In-house qPCR. Positive Cq values are shown.

§§ Enzygnost anti-Rubella-Virus IgG (Siemens Healthineers, Erlangen, Germany). Positive antibody titers are shown.

¶¶LIAISON Biotrin Parvovirus B19 IgG (DiaSorin, Saluggia, Italy). Positive antibody titers are shown.

## References

1. World Health Organization. Child growth standards [cited 2018 Jan 30]. [http://www.who.int/childgrowth/standards/hc\\_for\\_age/en/](http://www.who.int/childgrowth/standards/hc_for_age/en/)
2. Faye O, Faye O, Diallo D, Diallo M, Weidmann M, Sall AA. Quantitative real-time PCR detection of Zika virus and evaluation with field-caught mosquitoes. *Virology*. 2013;10:311. [PubMed http://dx.doi.org/10.1186/1743-422X-10-311](http://dx.doi.org/10.1186/1743-422X-10-311)
